# Supplementary material for: Compatibility assessment of solid ceramic electrolytes and active materials based on thermal dilatation for the development of solid-state batteries
Source: Royal Society of Chemistry journal article supplement (doi:10.1039/d0ma00743a), 2021-01-01
Supplement: d0ma00743a1.pdf [file d0ma00743a1.pdf]

Supporting Information

**Table 1**

**A- Ceramic Electrolytes**

| LLTO (LeBail) Cmmm |        |          |          |          |           |          |
|--------------------|--------|----------|----------|----------|-----------|----------|
| Temperature /°C    | Rwp /% | a /Å     | b /Å     | c /Å     | Mustrain  | Size /nm |
| 30                 | 8.10   | 7.753(1) | 7.803(1) | 7.706(1) | 2147(172) | 219(22)  |
| 100                | 8.57   | 7.758(1) | 7.803(1) | 7.714(1) | 1962(173) | 206(20)  |
| 200                | 8.87   | 7.764(1) | 7.808(1) | 7.723(1) | 2014(176) | 216(22)  |
| 300                | 9.14   | 7.771(1) | 7.816(1) | 7.728(1) | 2035(173) | 227(24)  |
| 400                | 9.48   | 7.778(1) | 7.819(1) | 7.739(1) | 2086(176) | 244(28)  |
| 500                | 9.62   | 7.786(1) | 7.828(1) | 7.747(1) | 2118(172) | 256(30)  |
| 600                | 9.85   | 7.794(1) | 7.835(1) | 7.756(1) | 1658(164) | 218(21)  |
| 700                | 10.14  | 7.802(1) | 7.844(1) | 7.764(1) | 1762(172) | 223(23)  |
| 800                | 10.45  | 7.810(1) | 7.851(1) | 7.773(1) | 2112(177) | 303(42)  |
| 900                | 10.58  | 7.818(1) | 7.864(1) | 7.778(1) | 2577(53)  | 427(96)  |
| 1000               | 9.69   | 7.827(1) | 7.840(1) | 7.821(1) | 872(107)  | 392(39)  |
| 30 (retour)        | 7.72   | 7.742(1) | 7.768(1) | 7.756(1) | 1883(106) | 630(101) |

| Al-LLZO (Le Bail) <i>I-43d</i> |        |           |           |          | La2Zr2O7 (Le Bail) <i>Fd-3m</i> |          |          |
|--------------------------------|--------|-----------|-----------|----------|---------------------------------|----------|----------|
| Temperature /°C                | Rwp /% | a /Å      | Mustrain  | Size /nm | a /Å                            | Mustrain | Size /nm |
| 30                             | 12.74  | 12.970(1) | 2626(136) | 84(1)    |                                 |          |          |
| 100                            | 14.74  | 13.003(1) | 4400(263) | 53(1)    |                                 |          |          |
| 200                            | 12.04  | 13.036(1) | 841(167)  | 52(1)    |                                 |          |          |
| 300                            | 12.60  | 13.045(1) | 481(150)  | 55(1)    |                                 |          |          |
| 400                            | 11.71  | 13.047(1) | 114(131)  | 57(1)    |                                 |          |          |
| 500                            | 11.34  | 13.056(1) | -201(139) | 63(1)    | 10.897(1)                       |          | 53(2)    |
| 600                            | 11.24  | 13.076(1) | 905(62)   | 124(2)   | 10.910(1)                       |          | 51(1)    |
| 700                            | 12.24  | 13.099(1) | 1001(47)  | 171(3)   | 10.912(1)                       |          | 69(2)    |
| 800                            | 12.56  | 13.123(1) | 896(49)   | 200(5)   | 10.898(1)                       |          | 73(3)    |
| 900                            | 12.68  | 13.144(1) | 718(49)   | 228(7)   | 10.905(1)                       |          | 57(3)    |
| 1000                           | 11.97  | 13.164(1) | 900(49)   | 303(11)  | 10.913(1)                       |          | 117(5)   |
| 30 (retour)                    | 10.79  | 12.962(1) | 1001(58)  | 244(9)   | 10.810(1)                       |          | 78(2)    |

| <b>LATP (Le Bail) R-3c</b> |               |             |             |                 |                 |
|----------------------------|---------------|-------------|-------------|-----------------|-----------------|
| <b>Temperature /°C</b>     | <b>Rwp /%</b> | <b>a /Å</b> | <b>c /Å</b> | <b>Mustrain</b> | <b>Size /nm</b> |
| <b>30</b>                  | 8.29          | 8.505(1)    | 20.800(1)   | 1063(78)        | 201(6)          |
| <b>100</b>                 | 8.85          | 8.501(1)    | 20.850(1)   | 1108(82)        | 206(7)          |
| <b>200</b>                 | 8.91          | 8.501(1)    | 20.909(1)   | 1280(81)        | 219(8)          |
| <b>300</b>                 | 10.44         | 8.501(1)    | 20.970(1)   | 1242(90)        | 224(9)          |
| <b>400</b>                 | 11.49         | 8.502(1)    | 21.034(1)   | 1243(95)        | 229(10)         |
| <b>500</b>                 | 9.29          | 8.504(1)    | 21.099(1)   | 856(67)         | 199(5)          |
| <b>600</b>                 | 10.76         | 8.503(1)    | 21.159(1)   | 1079(70)        | 254(9)          |
| <b>700</b>                 | 10.17         | 8.504(1)    | 21.225(1)   | 593(53)         | 253(7)          |
| <b>800</b>                 | 12.40         | 8.504(1)    | 21.297(1)   | 934(103)        | 219(12)         |
| <b>900</b>                 | 13.23         | 8.505(1)    | 21.365(1)   | 660(144)        | 158(9)          |
| <b>1000</b>                | 15.24         | 8.506(1)    | 21.430(1)   | 715(198)        | 139(9)          |
| <b>30 (retour)</b>         | 10.39         | 8.507(2)    | 20.800(3)   | 1388(272)       | 106(8)          |

## **B- Active material**

| <b>NMC111 (Rietveld) R-3m</b> |               |             |             |                 |                 |
|-------------------------------|---------------|-------------|-------------|-----------------|-----------------|
| <b>Temperature /°C</b>        | <b>Rwp /%</b> | <b>a /Å</b> | <b>c /Å</b> | <b>Mustrain</b> | <b>Size /nm</b> |
| <b>30</b>                     | 3.29          | 2.859(1)    | 14.231(1)   | 2383(62)        | 275(10)         |
| <b>100</b>                    | 3.67          | 2.862(1)    | 14.249(1)   | 2289(67)        | 270(10)         |
| <b>200</b>                    | 3.68          | 2.865(1)    | 14.277(1)   | 2115(65)        | 268(10)         |
| <b>300</b>                    | 3.58          | 2.869(1)    | 14.306(1)   | 1948(61)        | 262(9)          |
| <b>400</b>                    | 3.54          | 2.874(1)    | 14.337(1)   | 1660(59)        | 239(7)          |
| <b>500</b>                    | 3.33          | 2.878(1)    | 14.368(1)   | 1617(56)        | 247(7)          |
| <b>600</b>                    | 3.44          | 2.883(1)    | 14.401(1)   | 1575(57)        | 256(8)          |
| <b>700</b>                    | 4.22          | 2.889(1)    | 14.436(1)   | 41723(113)      | 357(25)         |
| <b>800</b>                    | 4.41          | 2.899(1)    | 14.483(1)   | 5284(134)       | 493(55)         |
| <b>900</b>                    | 3.71          | 2.909(1)    | 14.523(1)   | 999(62)         | 221(7)          |
| <b>1000</b>                   | 3.89          | 2.923(1)    | 14.564(1)   | 343(58)         | 207(6)          |
| <b>30 (retour)</b>            | 3.54          | 2.860(1)    | 14.231(1)   | 1791(38)        | 529(20)         |

| <b>NMC532 (Rietveld) R-3m</b>           |        |          |           |           |          |
|-----------------------------------------|--------|----------|-----------|-----------|----------|
| Temperature /°C                         | Rwp /% | a /Å     | c /Å      | Mustrain  | Size /nm |
| <b>30</b>                               | 3.78   | 2.870(1) | 14.239(1) | 1754(59)  | 298(11)  |
| <b>100</b>                              | 3.82   | 2.873(1) | 14.259(1) | 1986(63)  | 322(13)  |
| <b>200</b>                              | 3.84   | 2.876(1) | 14.288(1) | 1753(61)  | 303(12)  |
| <b>300</b>                              | 3.81   | 2.881(1) | 14.316(1) | 1631(59)  | 297(11)  |
| <b>400</b>                              | 3.71   | 2.885(1) | 14.347(1) | 1332(55)  | 264(8)   |
| <b>500</b>                              | 3.66   | 2.889(1) | 14.378(1) | 1204(52)  | 263(8)   |
| <b>600</b>                              | 3.68   | 2.894(1) | 14.410(1) | 1129(53)  | 259(8)   |
| <b>700</b>                              | 4.37   | 2.899(1) | 14.440(1) | 3290(97)  | 375(25)  |
| <b>800</b>                              | 4.77   | 2.907(1) | 14.472(1) | 4309(122) | 585(73)  |
| <b>900</b>                              | 5.12   | 2.917(1) | 14.516(1) | 4305(140) | 521(67)  |
| <b>1000</b>                             | 5.50   | 2.929(1) | 14.546(1) | 132(81)   | 206(8)   |
| <b>30 (retour)</b>                      | 4.95   | 2.877    | 14.262    | 1133      | 220      |
| <b>30 (retour dans un four ex-situ)</b> | 5.40   | 2.880(1) | 14.273(1) |           |          |

| <b>NCA (Le Bail) R-3m</b>               |        |           |           |          |          |
|-----------------------------------------|--------|-----------|-----------|----------|----------|
| Temperature /°C                         | Rwp /% | a /Å      | c /Å      | Mustrain | Size /nm |
| <b>30</b>                               | 2.75   | 2.866(1)  | 14.190(1) | 2129(51) | 213(5)   |
| <b>100</b>                              | 2.75   | 2.867 (1) | 14.213(1) | 2212(52) | 212(5)   |
| <b>200</b>                              | 2.68   | 2.870 (1) | 14.242(1) | 2485(52) | 238(6)   |
| <b>300</b>                              | 2.53   | 2.875 (1) | 14.263(1) | 2414(49) | 244(6)   |
| <b>400</b>                              | 2.43   | 2.879 (1) | 14.295(1) | 2203(46) | 237(5)   |
| <b>500</b>                              | 2.49   | 2.884(1)  | 14.327(1) | 1946(46) | 230(5)   |
| <b>600</b>                              | 2.57   | 2.888(1)  | 14.360(1) | 2007(48) | 242(6)   |
| <b>700</b>                              | 2.81   | 2.895 (1) | 14.394(1) | 2899(61) | 297(10)  |
| <b>800</b>                              | 2.69   | 2.904(1)  | 14.424(1) | 1976(52) | 273(8)   |
| <b>900</b>                              | 3.00   | 2.917 (1) | 14.450(1) | 869(51)  | 298(11)  |
| <b>30 (retour dans un four ex-situ)</b> | 2.56   | 2.873(1)  | 14.192(1) | 2319(34) | 663(27)  |

| LFP (Rietveld) <i>Pnma</i> |        |            |          |          |           |          |
|----------------------------|--------|------------|----------|----------|-----------|----------|
| Temperature /°C            | Rwp /% | a /Å       | b /Å     | c /Å     | Mustrain  | Size /nm |
| 30                         | 8.78   | 10.321(1)  | 6.001(1) | 4.693(1) | 1693(259) | 114(7)   |
| 100                        | 7.70   | 10.330(1)  | 6.006(1) | 4.698(1) | 2088(210) | 118(6)   |
| 200                        | 7.43   | 10.345 (1) | 6.015(1) | 4.707(1) | 2090(189) | 118(6)   |
| 300                        | 7.32   | 10.359(1)  | 6.025(1) | 4.716(1) | 2133(184) | 118(5)   |
| 400                        | 7.31   | 10.373(1)  | 6.037(1) | 4.727(1) | 2110(182) | 113(5)   |
| 500                        | 7.38   | 10.387(1)  | 6.049(1) | 4.738(1) | 1816(181) | 106(4)   |
| 600                        | 7.63   | 10.402(1)  | 6.062(1) | 4.749(1) | 1829(191) | 104(4)   |
| 700                        | 8.32   | 10.417(1)  | 6.075(1) | 4.760(1) | 4557(319) | 99(6)    |
| 800                        | 9.05   | 10.434(1)  | 6.089(1) | 4.772(1) | 4552(295) | 198(22)  |
| 30 (retour)                | 8.63   | 10.346(1)  | 6.003(1) | 4.693(1) | 732(218)  | 146(11)  |

| LFMP (Rietveld) <i>Pnma</i> |        |           |          |          |           |          |
|-----------------------------|--------|-----------|----------|----------|-----------|----------|
| Temperature /°C             | Rwp /% | a /Å      | b /Å     | c /Å     | Mustrain  | Size /nm |
| 30                          | 9.07   | 10.414(1) | 6.074(1) | 4.728(1) | -957(279) | 53(2)    |
| 100                         | 7.75   | 10.423(1) | 6.079(1) | 4.733(1) | -653(219) | 53(1)    |
| 200                         | 7.42   | 10.439(1) | 6.087(1) | 4.742(1) | -501(193) | 55(1)    |
| 300                         | 7.33   | 10.455(1) | 6.097(1) | 4.751(1) | -222(187) | 57(1)    |
| 400                         | 7.11   | 10.470(1) | 6.107(1) | 4.761(1) | -268(177) | 57(1)    |
| 500                         | 7.23   | 10.486(1) | 6.118(1) | 4.771(1) | -195(178) | 58(1)    |
| 600                         | 7.17   | 10.502(1) | 6.129(1) | 4.781(1) | 12(171)   | 60(1)    |
| 700                         | 8.15   | 10.517(1) | 6.140(1) | 4.791(1) | 3004(201) | 126(6)   |
| 800                         | 9.46   | 10.537(1) | 6.155(1) | 4.803(1) | 2626(199) | 170(12)  |
| 30 (retour)                 | 7.66   | 10.412(1) | 6.073(1) | 4.727(1) | 15(142)   | 123(5)   |

| FP (Rietveld) <i>Pnma</i> |        |          |          |          |           |          |
|---------------------------|--------|----------|----------|----------|-----------|----------|
| Temperature /°C           | Rwp /% | a /Å     | b /Å     | c /Å     | Mustrain  | Size /nm |
| 30                        | 8.35   | 9.818(1) | 5.790(1) | 4.781(1) | 1130(198) | 130(8)   |
| 100                       | 7.80   | 9.819(1) | 5.796(1) | 4.784(1) | 809(155)  | 123(6)   |
| 200                       | 7.64   | 9.825(1) | 5.807(1) | 4.789(1) | 891(147)  | 119(5)   |
| 300                       | 7.66   | 9.831(1) | 5.819(1) | 4.795(1) | 1128(142) | 129(5)   |
| 400                       | 7.68   | 9.836(1) | 5.831(1) | 4.801(1) | 1000(139) | 128(5)   |
| 500                       | 7.32   | 9.840(1) | 5.841(1) | 4.807(1) | 793(140)  | 130(5)   |
| 600                       |        |          |          |          |           |          |
| 700                       |        |          |          |          |           |          |
| 800                       |        |          |          |          |           |          |
| 30 (retour)               |        |          |          |          |           |          |

| LNMO   |          | Spinel (LeBail) <i>Fd-3m</i> |          | Rock salt (Le Bail) <i>Fm-3m</i> |          |          |
|--------|----------|------------------------------|----------|----------------------------------|----------|----------|
| Rwp /% | a /Å     | Mustrain                     | Size /nm | a /Å                             | Mustrain | Size /nm |
| 5.23   | 8.174(1) | 1961(196)                    | 41.4(8)  |                                  |          |          |
| 5.22   | 8.179(1) | 2362(195)                    | 42.5(8)  |                                  |          |          |
| 5.20   | 8.187(1) | 1740(194)                    | 40.1(7)  |                                  |          |          |
| 5.09   | 8.196(1) | 2077(188)                    | 41.9(7)  |                                  |          |          |
| 5.03   | 8.207(1) | 1614(184)                    | 41.1(7)  |                                  |          |          |
| 4.91   | 8.220(1) | 2379(183)                    | 42.9(7)  |                                  |          |          |
| 4.79   | 8.236(1) | 1345(169)                    | 42.7(7)  |                                  |          |          |
| 6.94   | 8.268(1) | 4567(154)                    | 157(7)   | 4.1884(3)                        |          |          |
| 9.88   | 8.299(1) |                              | 46.6(7)  | 4.1885(3)                        |          |          |
| 9.65   | 8.405(1) |                              | 30.9(5)  | 4.2106(3)                        |          |          |
| 6.46   | 8.504(2) |                              |          | 4.23546(7)                       |          |          |
| 6.42   | 8.206(1) | 1133                         | 117      |                                  |          |          |

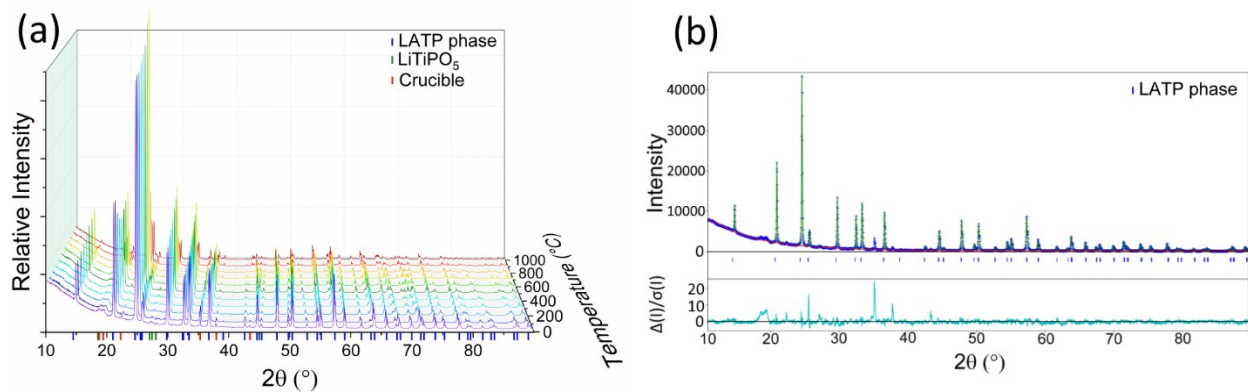

**Fig. SI-1:** (a) Diffractograms of LATP between 30 and 1000°C and (b) Fit of diffractogram of LATP at 30°C using Le Bail refinement.

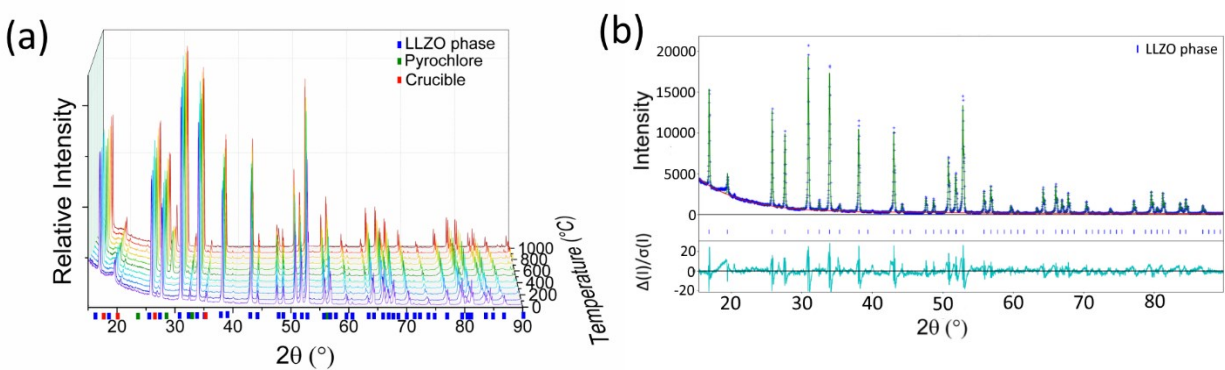

**Fig. SI-2:** (a) Diffractograms of LLZO between 30 and 1000°C and (b) Fit of diffractogram of LLZO at 30°C using Le Bail refinement.

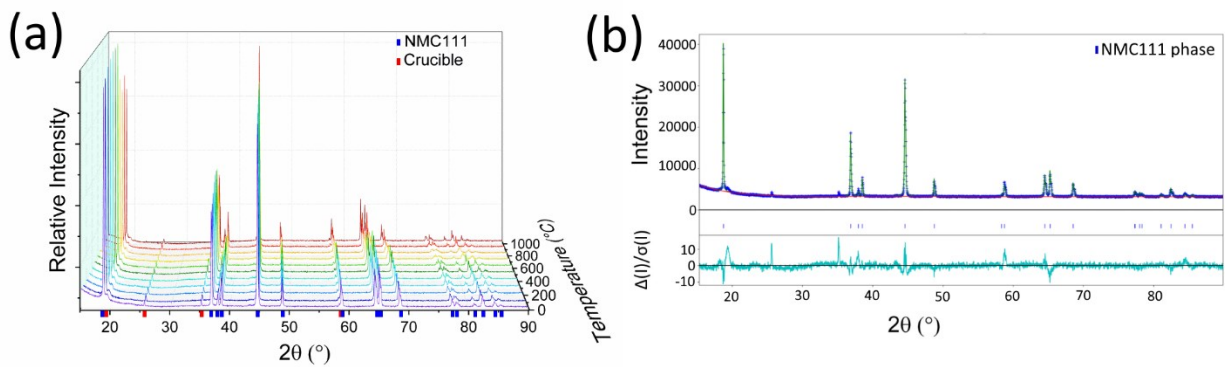

**Fig. SI-3:** (a) Diffractograms of NMC111 between 30 and 1000°C and (b) Fit of diffractogram of NMC111 at 30°C using Rietveld refinement.

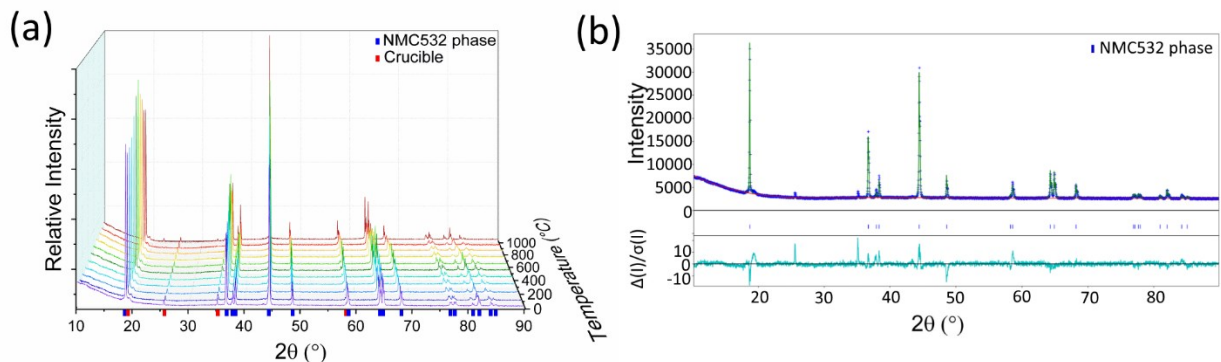

**Fig. SI-4:** (a) Diffractograms of NMC532 between 30 and 1000°C and (b) Fit of diffractogram of NMC532 at 30°C using Rietveld refinement.

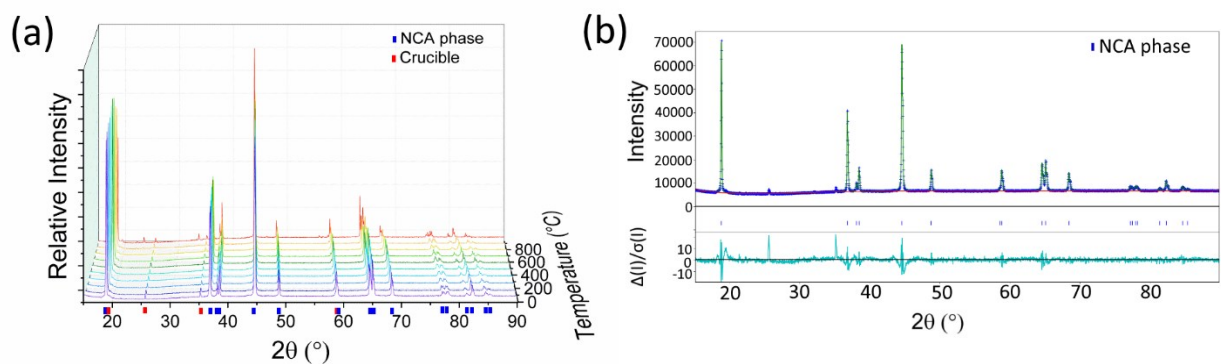

**Fig. SI-5:** (a) Diffractograms of NCA between 30 and 900°C and (b) Fit of diffractogram of NCA at 30°C using Le Bail refinement.

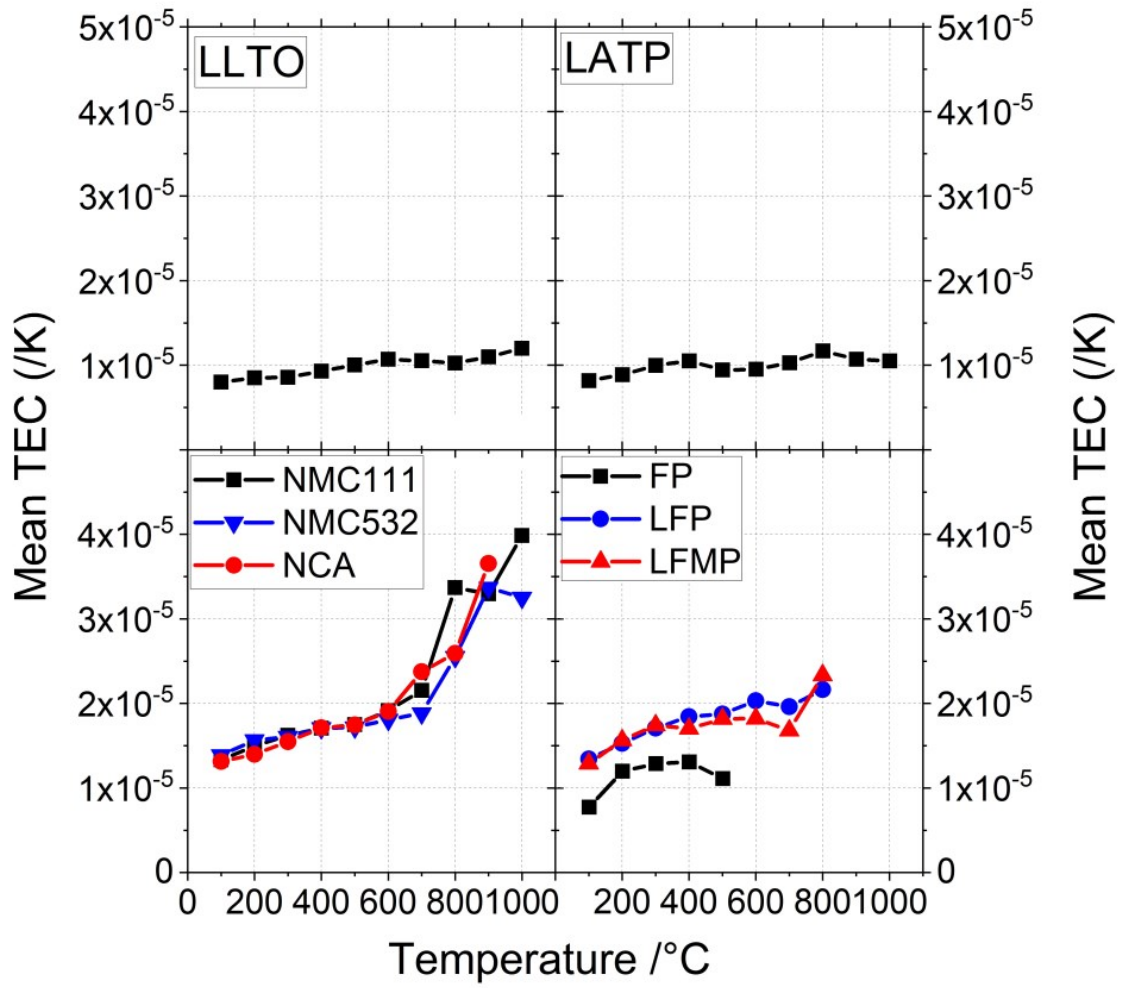

Fig. SI-6



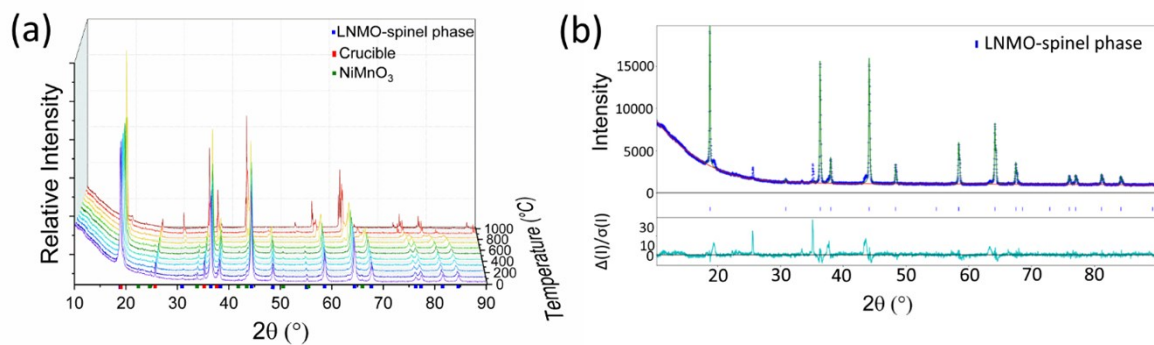

**Fig. SI-7:** (a) Diffractograms of LNMO between 30 and 1000°C and (b) Fit of diffractogram of LNMO at 30°C using Le Bail refinement.

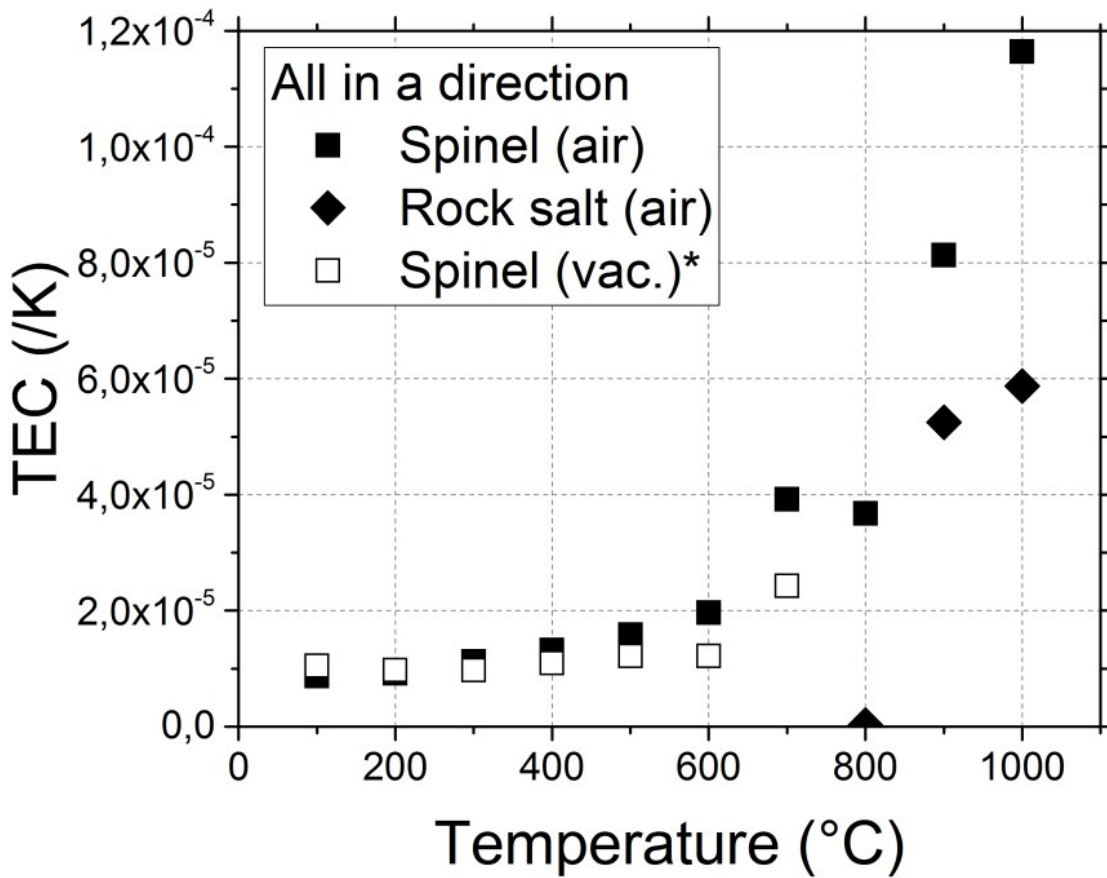

Fig. SI-8

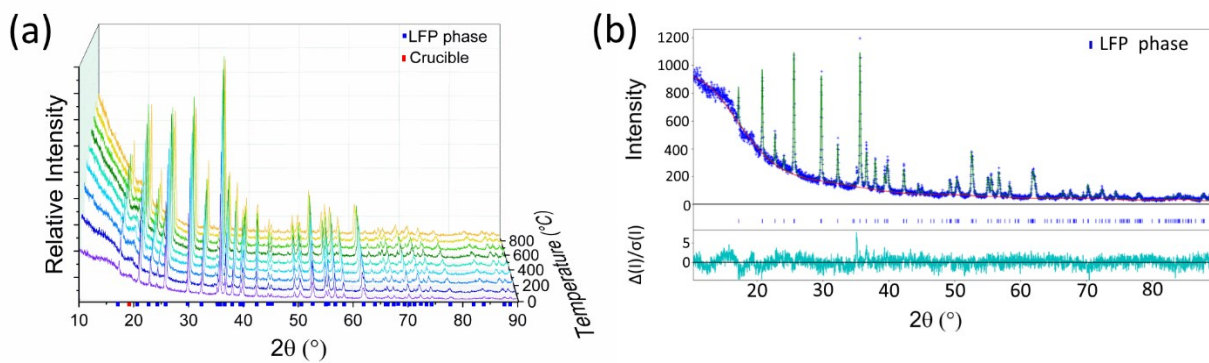

Fig. SI-9: (a) Diffractograms of LFP between 30 and 800°C and (b) Fit of diffractogram of LFP at 30°C using Rietveld refinement.

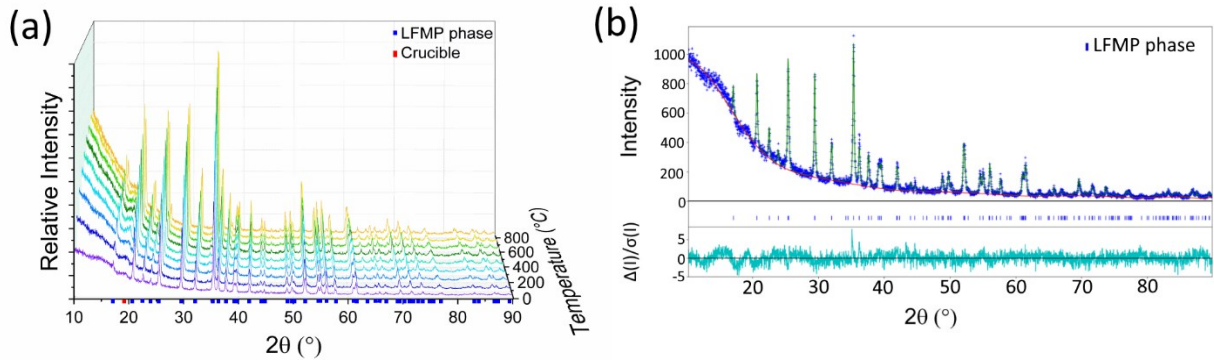

**Fig. SI-10:** (a) Diffractograms of LFMP between 30 and 1000°C and (b) Fit of diffractogram of LFMP at 30°C using Rietveld refinement.

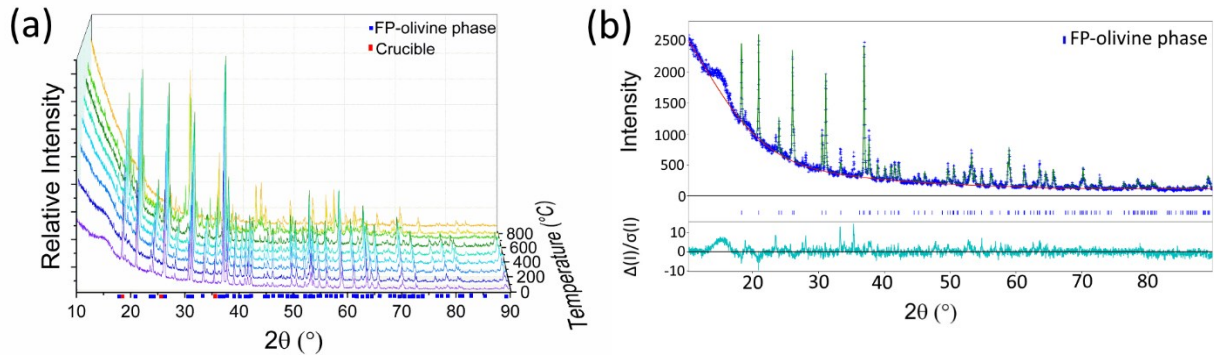

**Fig. SI-11:** (a) Diffractograms of FP between 30 and 1000°C and (b) Fit of diffractogram of FP at 30°C using Rietveld refinement.
